# Supplementary material for: Ribonucleic Acid Engineering of Dendritic Cells for Therapeutic Vaccination: Ready ‘N Able to Improve Clinical Outcome?
Source: PubMed Central journal article supplement (PMC7072269; doi:10.3390/cancers12020299), 2020-01-27

Supplementary Materials

# Ribonucleic Acid Engineering of Dendritic Cells for Therapeutic Vaccination: Ready 'N Able to Improve Clinical Outcome?

Yannick Willemen, Maarten Versteven, Marc Peeters, Zwi N. Berneman and Evelien L.J. Smits

Table S1. Clinical trials with RNA-modified dendritic cell vaccination.

| First author, year [ref]<br>Trial design<br>Disease specifics                                     | <i>n</i> | DC <sup>a</sup> + loading<br>RNA source<br>and product                | Vaccine dose,<br>other therapies                                                                            | Immunological results                                                                                                                                                                                                                                                                                                         | Clinical results                                                                                                                                           |
|---------------------------------------------------------------------------------------------------|----------|-----------------------------------------------------------------------|-------------------------------------------------------------------------------------------------------------|-------------------------------------------------------------------------------------------------------------------------------------------------------------------------------------------------------------------------------------------------------------------------------------------------------------------------------|------------------------------------------------------------------------------------------------------------------------------------------------------------|
| <b>Stage III/IV melanoma</b>                                                                      |          |                                                                       |                                                                                                             |                                                                                                                                                                                                                                                                                                                               |                                                                                                                                                            |
| Kyte et al, 2016 [1]<br>Phase I/II 2-arm<br>Metastatic (stage IV)<br>melanoma, except 1 stage III | 31       | mDC + EP<br>Tumor RNA<br>(autologous)                                 | 1–2 × 10 <sup>7</sup> DC IN<br>( <i>n</i> = 21) or ID ( <i>n</i> =<br>10) –/+ IL-2 ( <i>n</i> =<br>22 vs 9) | 16/31 “immune responders”<br>14/28 ↑ tumor-specific PBMC proliferation<br>(fresh or after in vitro restimulation)<br>12/28 weak-strong vaccine DTH reaction<br>More immune responders after ID vs IN<br>vaccination (80 vs 38%) (includes data from<br>Mu et al, 2005)                                                        | Median OS 10 m, significantly ↑ survival in<br>immune responders vs non-responders<br>1/29 PR, 3/29 SD, 25/29 PD<br>2/31 rapid PD<br>1/22 vitiligo grade 1 |
| Sioud et al, 2016 [2]<br>Case<br>Metastatic melanoma                                              | 1        | mDC + EP<br>IVT mRNA<br>TAA (hTERT or<br>survivin) + IVT<br>siRNA IDO | 5 × 10 <sup>6</sup> DC<br>(hTERT) + 5 × 10 <sup>6</sup><br>DC (survivin) ID                                 | ↑ hTERT- and survivin-specific T-cell<br>proliferation and PBMC IFN-γ secretion (after<br>in vitro stimulation)<br>↑ survivin, MelanA and NY-ESO-1 epitope-<br>specific CD8+ T cells (after in vitro<br>stimulation)                                                                                                          | MR, later PD                                                                                                                                               |
| Borch et al, 2016 [3]<br>Phase I 1-arm<br>Metastatic melanoma in<br>progression                   | 26       | mDC + EP<br>IVT mRNA<br>TAA (hTERT,<br>survivin, p53)                 | CT + 5 × 10 <sup>6</sup> DC<br>ID                                                                           | Ambiguous immune responses<br>6/17 TAA-specific IFN-γ-secreting PBMCs<br>before or during vaccination<br>2/17 TAA-specific CD4+ T-cell proliferation<br>during vaccination (after in vitro<br>restimulation)<br>4/17 TAA-specific CD8+ T-cell proliferation<br>before or during vaccination (after in vitro<br>restimulation) | 9/22 SD, 9/22 PD, 4/22 rapid PD<br>Median PFS 3.1 m<br>Median OS 10.4 m                                                                                    |

|                                                                                                                   |    |                                                                                                                          |                                                                                                                                                      |                                                                                                                                                                                                                                     |                                                                                                                                                                                                                            |
|-------------------------------------------------------------------------------------------------------------------|----|--------------------------------------------------------------------------------------------------------------------------|------------------------------------------------------------------------------------------------------------------------------------------------------|-------------------------------------------------------------------------------------------------------------------------------------------------------------------------------------------------------------------------------------|----------------------------------------------------------------------------------------------------------------------------------------------------------------------------------------------------------------------------|
| Wilgenhof et al, 2016 [4]<br>Phase II 1-arm                                                                       | 39 | mDC + EP<br>IVT mRNA<br>TriMix <sup>b</sup> +<br>TAA/LAMP<br>(tyr, Mage-A3,<br>Mage-C2 or<br>gp100)                      | 4 × 10 <sup>6</sup> (equal<br>mixtures of TAA-<br>loaded) DC ID +<br>2 × 10 <sup>7</sup> (equal<br>mixtures of TAA-<br>loaded) DC IV +<br>ipilimumab | ↑ PB lymphocytes, eosinophils and monocytes<br>3/10 TAA epitope-specific CD8+ T cells (1 pre-<br>existent)                                                                                                                          | 8/39 CR, 7/39 PR, 6/39 SD, 18/39 PD<br>Median PFS 6.2 m<br>Median OS 13.6 m<br>24/39 completed induction, 8/39<br>discontinued due to toxicity, and 7/39 due<br>to PD<br>14/39 grade 3–4 toxicity                          |
| Wilgenhof et al, 2015 [5]<br>Pilot 4-arm                                                                          | 30 | mDC + EP<br>IVT mRNA<br>TAA/LAMP<br>(tyr, Mage-A1,<br>Mage-A3,<br>Mage-C2,<br>MelanA or<br>gp100)                        | Resection, 2.4 ×<br>10 <sup>7</sup> (equal<br>mixtures of TAA-<br>loaded) DC ID<br>+/- adjuvant IFN-<br>α2b                                          | 4/10 TAA-specific DTH-infiltrating cells                                                                                                                                                                                            | 10/30 disease free, 20/30 relapsed<br>Median DFS 22 m<br>Median OS not reached after median FU 6.4<br>y<br>7/29 vitiligo                                                                                                   |
| Dannull et al, 2013 [6]<br>Phase I 3-arm<br>Stage IV melanoma, 10/12<br>no evidence of disease after<br>resection | 12 | mDC + EP<br>IVT mRNA<br>TAA (tyr,<br>Mage-A3,<br>MelanA, gp100)<br>+<br>IVT siRNA (3 iP<br>subunits,<br>control or none) | 10 <sup>7</sup> DC ID                                                                                                                                | 12/12 ↑ TAA-specific IFN-γ-secreting CD4+<br>and CD8+ T cells (after in vitro restimulation)<br>2/6 ↑ autologous melanoma cell line-specific<br>CTL lytic activity (both with iP-silenced DCs)                                      | DC vs DC + control siRNA vs DC + IP<br>siRNA 4 vs 3 vs 5 patients<br>1/2 CR and 1/2 transient PR (both with iP-<br>silenced DCs), 5/10 sustained CR<br>6/11 remained disease-free at median FU 35<br>m                     |
| Wilgenhof et al, 2013 [7]<br>Phase IB 4-arm                                                                       | 15 | mDC + EP<br>IVT mRNA<br>TriMix <sup>a</sup> +<br>TAA/LAMP<br>(tyr, Mage-A3,<br>Mage-C2 or<br>gp100)                      | 20/12/4/0 × 10 <sup>6</sup><br>DC ID +<br>4/12/20/24 × 10 <sup>6</sup><br>DC IV (equal<br>mixtures of TAA-<br>loaded DC)                             | 6/10 TAA epitope-specific DTH-infiltrating<br>CD8+ T cells<br>5/12 TAA epitope-specific DTH-infiltrating<br>CD4+ T cells                                                                                                            | 2/15 CR, 2/15 PR, 4/15 SD<br>Median PFS 5 m<br>Median OS 14 m                                                                                                                                                              |
| Aarntzen et al, 2012 [8]<br>Phase I(II) 1-arm                                                                     | 48 | mDC + EP<br>IVT mRNA<br>TAA (tyr,<br>gp100)                                                                              | 12 × 10 <sup>6</sup> DC +<br>KLH IN                                                                                                                  | 6/45 TAA epitope-specific PB CD8+ T cells<br>after vaccination (3/6 also before)<br>4/15 TAA epitope-specific PB CD4+ T cells<br>after vaccination (1/4 also before)<br>28/45 TAA epitope-specific DTH-infiltrating<br>CD8+ T cells | 15/26 stage III relapsed, median DFS 34.3 m<br>3/48 rapid PD, 1/19 PR, 1/19 MR, 5/19 SD,<br>trend for improved PFS and OS with vs<br>without TAA epitope-specific CD8+ T cells<br>(8.1 vs 2.8 m and 24.1 vs 11.0 m, resp.) |

|                                                                                                                                                                      |    |                                                                                                     |                                                                                                                       |                                                                                                                                                                           |                                                                                                                                          |
|----------------------------------------------------------------------------------------------------------------------------------------------------------------------|----|-----------------------------------------------------------------------------------------------------|-----------------------------------------------------------------------------------------------------------------------|---------------------------------------------------------------------------------------------------------------------------------------------------------------------------|------------------------------------------------------------------------------------------------------------------------------------------|
| Wilgenhof et al, 2011 [9]<br>(30/35 see Wilgenhof et al, 2015 [5])<br>Phase I 1-arm                                                                                  | 5  | mDC + EP<br>IVT mRNA<br>TriMix <sup>a</sup> +<br>TAA/LAMP<br>(tyr, Mage-A3,<br>Mage-C2 or<br>gp100) | 17–66 × 10 <sup>6</sup> (avg<br>43 × 10 <sup>6</sup> ; equal<br>mixtures of TAA-<br>loaded) DC ID,<br>IFN-α2b (29/32) | 12/21 vaccine-specific DTH-infiltrating CD8+ T<br>cells, 9/21 specific for > 1 TAA                                                                                        | 9/15 relapsed, median DFS 23 m ( <i>n</i> = 15)<br>11/20 SD, 9/20 PD, median PFS 3.1 m,<br>median OS 15.1 m<br>32/35 4 vaccines feasible |
| Markovic et al, 2006 [10]<br>Phase I 1-arm<br>Metastatic melanoma                                                                                                    | 6  | mDC + EP<br>Tumor RNA<br>(autologous)                                                               | 5 × 10 <sup>6</sup> DC SC                                                                                             | 0/6 tumor-specific T cells                                                                                                                                                | No objective responses<br>1/6 SD, 5/6 PD                                                                                                 |
| <b>Human immunodeficiency virus-1</b>                                                                                                                                |    |                                                                                                     |                                                                                                                       |                                                                                                                                                                           |                                                                                                                                          |
| Gay et al, 2018 [11]<br>Retroviruses<br>1-arm sub-study<br>≥ 6 m ART + viral RNA < 50<br>copies/mL, nadir CD4+ T<br>cells ≥ 200/mm <sup>3</sup>                      | 6  | mDC + EP<br>IVT mRNA<br>autologous<br>viral HIV-1<br>(Gag, Vpr, Rev<br>and Nef),<br>CD40L           | 1.2 × 10 <sup>7</sup> DC (+/-<br>mRNA) ID, ATI<br>+ booster DC                                                        | 6/6 increase HIV-1-specific CD28+/CD45RA-<br>CD8+ EM CTLs                                                                                                                 | No sustained ART interruption<br>Expansion of CD8+ effector T cells ~ longer<br>time to viral rebound                                    |
| Jacobson et al, 2016 [12]<br>Phase IIb 2-arm RCT 2:1<br>≥ 3 m viral RNA ≤ 200<br>copies/mL and < 50<br>copies/mL at screening,<br>CD4+ T cells ≥ 450/mm <sup>3</sup> | 54 | mDC + EP<br>IVT mRNA<br>autologous<br>viral HIV-1<br>(Gag, Vpr, Rev<br>and Nef),<br>CD40L           | 10 <sup>7</sup> DC ID ( <i>n</i> =<br>37) or placebo ( <i>n</i><br>= 17), ATI +<br>booster DC                         | ↑ functional (+/- vaccine-specific) CD28+<br>CD45RA- CTLs after DCs vs placebo                                                                                            | No differences in viral RNA levels after<br>placebo vs DCs<br>No differences in CD4+ T-cell counts after<br>placebo vs DCs               |
| Gandhi et al, 2016 [13]<br>Phase I 2-arm RCT 2:1<br>≥ 1 y ART + CD4+ T cells ≥<br>200/mm <sup>3</sup> , ≥ 6 m viral RNA <<br>50 copies/mL                            | 15 | mDC + EP<br>IVT mRNA<br>HIV-1/LAMP<br>(Gag and Nef)                                                 | 5–15 × 10 <sup>6</sup> DC +/-<br>mRNA ( <i>n</i> = 10 vs<br>5) ID + 1.5–6 × 10 <sup>6</sup><br>DC + KLH ID            | No significant differences in Gag- or Nef-<br>specific IFN-γ-secreting PBMCs after mRNA-<br>EP DCs vs mock-EP DCs<br>↑ KLH-specific CD4+ and CD8+ T-cell<br>proliferation | Not evaluated                                                                                                                            |
| Van Gulck et al, 2012 [14]<br>Phase I/II 1-arm<br>Stable under ART                                                                                                   | 6  | mDC + EP<br>IVT mRNA<br>HIV-1/LAMP<br>(Gag or<br>chimeric Tat-<br>Rev-Nef)                          | 5 × 10 <sup>6</sup> DC SC + 5<br>× 10 <sup>6</sup> DC ID, ATI                                                         | 6/6 ↑ and 5/6 broadened Gag-specific PBMC<br>responses<br>4/5 ↑ CD8+ T-cell mediated viral suppression<br>in vitro                                                        | Not evaluated                                                                                                                            |

|                                                                                                                          |    |                                                                                  |                                                                                            |                                                                                                                                    |                                                                                                                                                                                                                                       |
|--------------------------------------------------------------------------------------------------------------------------|----|----------------------------------------------------------------------------------|--------------------------------------------------------------------------------------------|------------------------------------------------------------------------------------------------------------------------------------|---------------------------------------------------------------------------------------------------------------------------------------------------------------------------------------------------------------------------------------|
| Allard et al, 2012 [15]<br>Phase I/II 1-arm<br>≥ 3 m ART + viral RNA ≤ 50 copies/mL + CD4+ T cells ≥ 500/mm <sup>3</sup> | 17 | mDC + EP<br>IVT mRNA<br>HIV-1/LAMP<br>(Tat, Rev or Nef)                          | 5 × 10 <sup>6</sup> DC SC + 5 × 10 <sup>6</sup> DC ID, ATI                                 | 17/33 ↑ HIV-1-specific PBMC responses                                                                                              | No indication of efficacy compared to historical controls<br>11/17 resumed ART < 96 w after vaccination (median time to resumption 50 w)<br>6/17 remained off ART ≥ 96 w after vaccination                                            |
| Routy et al, 2010 [16]<br>Phase I 1-arm<br>Viral RNA ≤ 200 copies/mL, ≥ 12 w ART                                         | 10 | mDC + EP<br>IVT mRNA<br>autologous viral HIV-1 (Gag, Vpr, Rev and Nef),<br>CD40L | 10 <sup>7</sup> DC ID                                                                      | 7/9 ↑ HIV-1-specific CD8+ T-cell proliferation after in vitro restimulation                                                        | Not evaluated<br>10/10 4 vaccines feasible                                                                                                                                                                                            |
| <b>Prostate cancer +/- metastases</b>                                                                                    |    |                                                                                  |                                                                                            |                                                                                                                                    |                                                                                                                                                                                                                                       |
| Kongsted et al, 2017 [17]<br>Phase II 2-arm RCT 1:1<br>mCRPC in progression                                              | 43 | mDC + EP<br>IVT mRNA<br>TAA (hTERT, survivin, PSA, PAP)                          | Docetaxel +/- 5 × 10 <sup>6</sup> DC ID                                                    | Ambiguous immune responses<br>9/18 TAA-specific IFN-γ-secreting PBMCs before ( <i>n</i> = 6) or during ( <i>n</i> = 8) vaccination | Docetaxel +/- DC 19 vs 21 evaluable patients<br>3/7 PR, 4/7 SD on docetaxel alone vs 1/4 PR, 2/4 SD, 1/4 PD on combination therapy<br>No difference in PSA response rates, median<br>PFS 5.5 vs 5.7 m (ns) or DSS 21.9 vs 25.1 m (ns) |
| Mu et al, 2005 [18]<br>(see also Kyte et al, 2016 [1] for ID vs IN)<br>Phase I 2-arm<br>CRPC +/- bone M+                 | 20 | mDC + EP<br>Tumor RNA (3 PC cell lines)                                          | 2 × 10 <sup>7</sup> DC IN or ID                                                            | 10/19 tumor-specific IFN-γ-secreting PBMCs                                                                                         | 11/19 SD (based on PSA), 8/19 PD<br>13/19 slower PSA increase (log slope pre vs post)<br>1/20 rapid PD                                                                                                                                |
| Su et al, 2005 [19]<br>Phase I 2-arm rdm dose-escalation<br>mPC                                                          | 20 | mDC + EP<br>IVT mRNA<br>TAA (hTERT)<br>+/- LAMP-1                                | 10 <sup>7</sup> DC ID                                                                      | 11/12 induction of hTERT-specific CD8+ T cells<br>9/12 induction of hTERT-specific CD4+ T cells (more with LAMP-1)                 | No objective responses<br>↑ PSA doubling time ( <i>n</i> = 5)                                                                                                                                                                         |
| Heiser et al, 2002 [20]<br>Phase I 1-arm dose-escalation<br>mPC                                                          | 16 | iDC + PP<br>IVT mRNA<br>TAA (PSA)                                                | 10 <sup>7</sup> , 3 × 10 <sup>7</sup> or 5 × 10 <sup>7</sup> DC IV + 10 <sup>7</sup> DC ID | 8/8 ↑ PSA-specific IFN-γ-secreting PBMCs                                                                                           | Insufficient/ambiguous data<br>1/7 PSA decrease, 5/7 slower PSA increase (log slope pre vs post), 1/7 unaffected PSA increase<br>2/16 rapid PD, 1/16 sepsis, 2/16 skeletal PD,<br>4/16 intake of PSA-affecting compounds              |
| <b>Acute myeloid leukemia in complete remission</b>                                                                      |    |                                                                                  |                                                                                            |                                                                                                                                    |                                                                                                                                                                                                                                       |

|                                                                                                |    |                                                                |                                                                                                                         |                                                                                                                                                                                                                                     |                                                                                                                                                                            |
|------------------------------------------------------------------------------------------------|----|----------------------------------------------------------------|-------------------------------------------------------------------------------------------------------------------------|-------------------------------------------------------------------------------------------------------------------------------------------------------------------------------------------------------------------------------------|----------------------------------------------------------------------------------------------------------------------------------------------------------------------------|
| Anguille et al, 2017 [21]<br>Phase II 3-arm<br>High relapse risk                               | 30 | mDC + EP<br>IVT mRNA<br>TAA (WT1) +/-<br>LAMP +/-<br>codon opt | $5 \times 10^6$ , $10^7$ or $2 \times 10^7$ DC + KLH ID                                                                 | 6/12 ↑ WT1 epitope-specific CD8+ T cells                                                                                                                                                                                            | 9/30 molecular remission (2 PR to CR, 4 later relapsed), 4/30 stable MRD<br>6/30 sustained CR1, 22/29 (1 did not reach CR1) relapsed, 1/29 lung cancer<br>Median OS 99.4 m |
| Khoury et al, 2017 [22]<br>Phase II 1-arm<br>CR1 + high relapse risk or<br>CR2 > 6 m after CR1 | 21 | mDC + EP<br>IVT mRNA<br>TAA (hTERT)<br>+/- LAMP-1              | $10^7$ DC ID                                                                                                            | 11/19 TAA-specific IFN- $\gamma$ -secreting PBMCs                                                                                                                                                                                   | 2/21 early relapse<br>11/19 sustained CR, 8/19 relapsed (median FU 52 m)<br>3/21 (possible) treatment-related AE grade $\geq$ 3, incl. 1/21 ITP grade 4                    |
| <b>Metastatic renal cell carcinoma</b>                                                         |    |                                                                |                                                                                                                         |                                                                                                                                                                                                                                     |                                                                                                                                                                            |
| Amin et al, 2015 [23]<br>Phase II 1-arm                                                        | 25 | mDC + EP<br>Tumor RNA<br>(autologous)                          | Resection,<br>sunitinib + $1.2 \times 10^7$ DC ID                                                                       | 10/14 ↑ functional CD28+ CD45RA- CTLs,<br>correlated with duration of survival                                                                                                                                                      | 9/21 PR, 4/21 SD, 8/21 PD<br>Median PFS 11.2 m<br>Median OS 30.2 m<br>10/22 subsequent therapy<br>1/25 rapid PD                                                            |
| Dannull et al, 2005 [24]<br>Phase I 2-arm RCT<br>1 ovarian                                     | 11 | mDC + EP<br>Tumor RNA<br>(autologous)                          | $10^7$ DC ID +/-<br>DAB <sub>389</sub> IL-2 <sup>c</sup> IV (4<br>d prior)                                              | 9/10 ↑ tumor-specific CD8+ (higher after<br>DAB389IL-2, $n = 6$ ) and CD4+ T cells<br>7/7 ↓ CD4+/CD25high Tregs after DAB389IL-2                                                                                                    | Not evaluated                                                                                                                                                              |
| Su et al, 2003 [25]<br>Phase I 1-arm dose-<br>escalation                                       | 15 | iDC + PP<br>Tumor RNA<br>(autologous)                          | Nephrectomy,<br>$10^7$ , $3 \times 10^7$ or $5 \times 10^7$<br>DC IV + $10^7$<br>DC ID                                  | 6/7 ↑ tumor RNA-specific IFN- $\gamma$ -secreting T<br>cells<br>7/7 low numbers of benign renal tissue-specific<br>IFN- $\gamma$ -secreting T cells<br>Small increases in defined TAA-specific IFN- $\gamma$ -<br>secreting T cells | Insufficient/ambiguous data<br>Mean OS 19.8 m<br>5/15 rapid PD                                                                                                             |
| <b>Pancreatic cancer</b>                                                                       |    |                                                                |                                                                                                                         |                                                                                                                                                                                                                                     |                                                                                                                                                                            |
| Shindo et al, 2014 [26]<br>Retrospective<br>Unresectable or recurrent<br>pancreatic cancer     | 42 | mDC + EP<br>IVT mRNA<br>TAA (Muc1)                             | CT + $0.04-4 \times 10^7$<br>(avg $1.8 \times 10^7$ )<br>DC ID + $1-12 \times 10^8$<br>(avg $6 \times 10^8$ ) CTL<br>IV | Mean increase in Muc1-specific IFN- $\gamma$ -<br>secreting PBMCs ( $n = 6$ )                                                                                                                                                       | 1/42 CR, 3/42 PR, 22/42 SD, 16/42 PD<br>Median OS 13.9 m                                                                                                                   |
| Suso et al, 2011 [27]<br>Case<br>Pancreatic AC + LN M+                                         | 1  | mDC + EP<br>IVT mRNA<br>TAA (hTERT)                            | CT, $5 \times 10^6$ DC ID                                                                                               | 1/1 ↑ hTERT epitope-specific CD8+ T cells                                                                                                                                                                                           | 1/1 SD/PR (42 m FU)                                                                                                                                                        |
| Morse et al, 2002 [28]<br>Phase I 1-arm                                                        | 3  | iDC + PP<br>IVT mRNA<br>TAA (CEA)                              | Neoadjuvant<br>CRT (2/3),<br>complete                                                                                   | Insufficient data                                                                                                                                                                                                                   | 3/3 sustained CR (3.75, 3.75 and 4 y)                                                                                                                                      |

| CEA+ pancreatic papillary mucinous (1/3) or AC (2/3)                                                 |    | resection, 10 <sup>7</sup> DC ID                                                         |                                                                                                                                             |                                                                                                                                                                             |                                                                                                                                                                                                                   |
|------------------------------------------------------------------------------------------------------|----|------------------------------------------------------------------------------------------|---------------------------------------------------------------------------------------------------------------------------------------------|-----------------------------------------------------------------------------------------------------------------------------------------------------------------------------|-------------------------------------------------------------------------------------------------------------------------------------------------------------------------------------------------------------------|
| <b>Glioblastoma</b>                                                                                  |    |                                                                                          |                                                                                                                                             |                                                                                                                                                                             |                                                                                                                                                                                                                   |
| Reap et al, 2018 [29]<br>Pilot 2-arm RCT 1:1                                                         | 17 | mat [iDC + EP]<br>IVT mRNA<br>CMV<br>pp65/LAMP                                           | Resection, CRT,<br>CT, 3 × 10 <sup>7</sup> /kg<br>pp65-specific T<br>cells + 2 × 10 <sup>7</sup> DC<br>(n = 9) or placebo<br>(n = 8) ID     | ↑ polyfunctional (IFN-γ <sup>+</sup> TNF-α <sup>+</sup> CCL3 <sup>+</sup> ) pp65-<br>specific CD8 <sup>+</sup> T cells in 4/8 (DC) vs 1/7<br>(placebo) patients             | Placebo vs DC 7 vs 8 efficacy evaluable<br>patients<br>No severe AEs<br>Fold change of polyfunctional pp65-specific<br>CD8 <sup>+</sup> T cells correlated with OS after DC                                       |
| Batich et al, 2017 [30]<br>Phase I 1-arm                                                             | 14 | mat [iDC + PP]<br>IVT mRNA<br>CMV<br>pp65/LAMP                                           | Resection, CRT,<br>CT + 2 × 10 <sup>7</sup> DC<br>ID + 150 μg GM-<br>CSF                                                                    | 11/14 evaluable patients<br>10/11 CMV-specific IFN-γ-secreting PBMCs<br>↑ pp65 epitope-specific CD8 <sup>+</sup> T cells                                                    | 11/14 evaluable patients<br>Median PFS 25.3 m<br>Median OS 41.1 m, 30 m gain vs historical<br>controls<br>1/11 grade 3 allergic reaction to GM-CSF                                                                |
| Mitchell et al, 2015 [31]<br>Phase I 2-arm RCT 1:1                                                   | 13 | mat [iDC + PP]<br>IVT mRNA<br>CMV<br>pp65/LAMP                                           | Resection, CRT,<br>unpulsed DCs vs<br>Td, CT + 2 × 10 <sup>7</sup><br>DC ID +/-<br>autologous<br>lymphocytes                                | ↑ pp65-specific IFN-γ-secreting PBMCs and<br>DC migration to LNs correlated with OS                                                                                         | 1/13 rapid PD (before vaccination)<br>↑ pp65-specific IFN-γ-secreting PBMCs<br>correlated with OS Unpulsed DC vs Td<br>preconditioning median PFS and OS 10.8 m<br>and 18.5 m vs median PFS and OS not<br>reached |
| Vik-Mo et al, 2013 [32]<br>Phase I 1-arm (vs historical<br>controls)<br>No need for cortico-steroids | 7  | mDC + EP<br>Tumor RNA<br>(autologous) +<br>IVT mRNA<br>TAA (hTERT or<br>survivin) in 5/7 | Resection, CRT,<br>10 <sup>7</sup> DC ID                                                                                                    | 7/7 ↑ lymphocyte proliferation after in vitro<br>stimulation with either autologous tumor cell<br>lysate, hTERT or survivin at some point<br>during vaccination vs baseline | 5/7 relapsed<br>Median PFS 22.8 m<br>Median OS 24.9 m (from resection)                                                                                                                                            |
| <b>CEA+ metastatic cancer</b>                                                                        |    |                                                                                          |                                                                                                                                             |                                                                                                                                                                             |                                                                                                                                                                                                                   |
| Morse et al, 2003 [33]<br>Phase I 1-arm dose-<br>escalation                                          | 31 | iDC + PP<br>IVT mRNA<br>TAA (CEA)                                                        | 10 <sup>7</sup> DC IV, × 10 <sup>7</sup><br>DC IV + 10 <sup>6</sup> DC<br>ID, 10 <sup>8</sup> DC IV +<br>10 <sup>6</sup> DC ID +/- IL-<br>2 | Insufficient/ambiguous data                                                                                                                                                 | Insufficient/ambiguous data<br>6/24 SD, 18/24 PD, median OS 15.7 m<br>6/14 high dose unfeasible                                                                                                                   |
| Phase II 1-arm<br>No evidence of disease after<br>surgery (MRD), 11/13 CRC<br>with resected liver M+ | 13 |                                                                                          | 3 × 10 <sup>7</sup> DC IV +<br>10 <sup>6</sup> DC ID                                                                                        |                                                                                                                                                                             | 3/12 sustained CR<br>9/12 relapsed, median DFS 4.0 m                                                                                                                                                              |
| <b>Colorectal cancer +/- metastases</b>                                                              |    |                                                                                          |                                                                                                                                             |                                                                                                                                                                             |                                                                                                                                                                                                                   |

|                                                                                    |    |                                                             |                                                                                                                                          |                                                                                                                |                                                                                                                            |
|------------------------------------------------------------------------------------|----|-------------------------------------------------------------|------------------------------------------------------------------------------------------------------------------------------------------|----------------------------------------------------------------------------------------------------------------|----------------------------------------------------------------------------------------------------------------------------|
| Lesterhuis et al, 2010 [34]<br>Phase I 1-arm<br>CRC + resectable liver M+          | 5  | mDC + EP<br>IVT mRNA<br>TAA (CEA)                           | $5 \times 10^6$ DC + KLH<br>ID + $7-17 \times 10^6$<br>(avg $11 \times 10^6$ ) DC<br>+ KLH IV                                            | 0/5 CEA-specific DTH-infiltrating CD8+ T cells                                                                 | 4/5 median PFS 26 m after resection                                                                                        |
| Rains et al, 2001 [35]<br>Phase I/II 1-arm<br>Metastatic CRC                       | 15 | iDC + PP<br>Tumor RNA<br>(autologous)                       | avg $0.43-2.4 \times 10^6$<br>DC + KLH IV                                                                                                | 11/13 positive KLH skin test                                                                                   | 6/12 SD, 6/12 PD<br>7/13 CEA decrease<br>2/13 CEA slower rise                                                              |
| <b>Stage II/III multiple myeloma</b>                                               |    |                                                             |                                                                                                                                          |                                                                                                                |                                                                                                                            |
| Hobo et al, 2013 [36]<br>Phase I 1-arm<br>CR/PR after prior therapy                | 12 | mDC + EP<br>IVT mRNA<br>TAA (Mage-A3,<br>survivin,<br>BCMA) | $4-11 \times 10^6$ (median<br>$8 \times 10^6$ ) DC +<br>KLH ID + $5-22 \times$<br>$10^6$ (median $1.5 \times$<br>$10^7$ ) DC + KLH<br>IV | 6/12 DTH reaction with 2/6 TAA-specific IFN- $\gamma$ -<br>secreting DTH-infiltrating CD4+ and CD8+ T<br>cells | 10/12 alive at median FU 25 m after<br>vaccination, 5/10 SD, 5/10 PD                                                       |
| <b>Hepatocellular carcinoma</b>                                                    |    |                                                             |                                                                                                                                          |                                                                                                                |                                                                                                                            |
| Maeda et al, 2015 [37]<br>Phase I 3-arm<br>HCV-related HCC<br>(untreated, only SD) | 12 | mDC + EP<br>IVT mRNA<br>Hsp70                               | Resection or<br>ablation, $3 \times 10^7$ ,<br>$2 \times 10^7$ or $3 \times 10^7$<br>DC ID                                               | Mean increase in Hsp70-specific IFN- $\gamma$ -<br>secreting PBMCs (ns)                                        | 1/12 CR, 1/12 PR (conversion to CR), 5/12<br>SD, 5/12 PD<br>Grade 3 liver abscess                                          |
| <b>Stage IV adrenal or retroperitoneal neuroblastoma</b>                           |    |                                                             |                                                                                                                                          |                                                                                                                |                                                                                                                            |
| Caruso et al, 2005 [38]<br>Phase I 1-arm dose-<br>escalation                       | 11 | iDC + PP<br>Tumor RNA<br>(autologous)                       | CT, apheresis,<br>CT, CT,<br>resection, RT,<br>CT, HSCT, $5 \times$<br>$10^6$ DC IV + $5 \times$<br>$10^6$ DC ID                         | 0/5 tumor-specific T cells<br>2/3 $\uparrow$ tumor-specific antibodies                                         | 7/11 vaccinated (3/11 rapid PD, 1/11<br>insufficient DC)<br>1/11 SD, 10/11 PD and dead, median PFS 14<br>m, median OS 19 m |
| <b>Relapsed central nervous system tumors</b>                                      |    |                                                             |                                                                                                                                          |                                                                                                                |                                                                                                                            |
| Caruso et al, 2004 [39]<br>Phase I 1-arm dose-<br>escalation<br>Low and high grade | 9  | iDC + PP<br>Tumor RNA<br>(autologous)                       | $5 \times 10^6$ DC IV + $5$<br>$\times 10^6$ DC ID                                                                                       | 0/7 tumor-specific T cells<br>2/5 $\uparrow$ tumor-specific antibodies                                         | 1/7 PR, 4/7 SD and 2/7 PD after 8 w<br>2/5 SD and 3/5 PD after 18 w<br>1/9 rapid PD, 1/9 insufficient RNA                  |
| <b>Cytomegalovirus</b>                                                             |    |                                                             |                                                                                                                                          |                                                                                                                |                                                                                                                            |
| Van Craenenbroeck et al,<br>2015 [40]<br>Pilot<br>Preventive                       | 7  | mDC + EP<br>IVT mRNA<br>CMV pp65                            | $1 \times 10^7$ or $1 \times 10^5$<br>DC ID                                                                                              | 3/4 pp65-specific IFN- $\gamma$ -secreting PBMCs (after<br>in vitro restimulation)<br>0/4 CMV seroconversion   | 1/4 grade 2 GI GVHD                                                                                                        |
| <b>Ovarian cancer</b>                                                              |    |                                                             |                                                                                                                                          |                                                                                                                |                                                                                                                            |

|                                                                                                                                  |    |                                                                                                     |                                                                                                            |                                                                                              |                                                |
|----------------------------------------------------------------------------------------------------------------------------------|----|-----------------------------------------------------------------------------------------------------|------------------------------------------------------------------------------------------------------------|----------------------------------------------------------------------------------------------|------------------------------------------------|
| Coosemans et al, 2013 [41]<br>Cases                                                                                              | 2  | mDC + EP<br>IVT mRNA<br>TAA (WT1)                                                                   | Multiple CT, 7–<br>61 × 10 <sup>6</sup> (avg 21 ×<br>10 <sup>6</sup> ) DC ID +<br>topical<br>imiquimod     | 1/2 ↑ WT1 epitope-specific CD8+ T cells                                                      | 2/2 PD                                         |
| Sioud et al, 2013 [42]<br>Phase I 1-arm (pilot)<br>FIGO stage IIIc (2/4), uterine<br>M+, peritoneal                              | 4  | mDC + EP<br>IVT mRNA<br>TAA (hTERT or<br>survivin) + IVT<br>siRNA IDO                               | 5 × 10 <sup>6</sup> DC<br>(hTERT) + 5 × 10 <sup>6</sup><br>DC (survivin) ID                                | ↑ hTERT-(4/4) and survivin-specific (3/4)<br>PBMC proliferation (after in vitro stimulation) | Insufficient/ambiguous data                    |
| Hernando et al, 2007 [43]<br>Case<br>FIGO stage IIIc                                                                             | 1  | mDC + EP<br>IVT mRNA<br>TAA (FR-α)                                                                  | 2 × [CT,<br>debulking], CT,<br>LN dissection,<br>2×10 <sup>6</sup> and 17–<br>25×10 <sup>6</sup> DC IN     | ↑ tumor-specific CD8+ and CD4+ T cells                                                       | PR at 16 m<br>↓ CA-125 at 4 w (640 to 60 U/mL) |
| <b>Uterine cancer</b>                                                                                                            |    |                                                                                                     |                                                                                                            |                                                                                              |                                                |
| Coosemans et al, 2013 [44]<br>Phase I/II 1-arm (pilot)                                                                           | 6  | mDC + EP<br>IVT mRNA<br>TAA (WT1)                                                                   | Multiple CT, 1–<br>32 × 10 <sup>6</sup> (avg 6–22<br>× 10 <sup>6</sup> ) DC ID +<br>topical<br>imiquimod   | 2/4 ↑ WT1 epitope-specific CD8+ T cells                                                      | 1/6 MR, 1/6 SD, 4/6 PD                         |
| <b>Early reports on patients for which longer follow-up data have been published</b>                                             |    |                                                                                                     |                                                                                                            |                                                                                              |                                                |
| Van Nuffel et al, 2012 [45]<br>(see Wilgenhof et al, 2013<br>[7])<br>Case<br>Stage IV-M1c melanoma                               | 1  | mDC + EP<br>IVT mRNA<br>TriMix <sup>a</sup> +<br>TAA/LAMP<br>(tyr, Mage-A3,<br>Mage-C2 or<br>gp100) | CT, 11 × 10 <sup>6</sup> DC<br>ID + 20 × 10 <sup>6</sup> DC<br>IV (equal<br>mixtures of TAA-<br>loaded DC) | Expansion of multiple different TAA epitope-<br>specific CD8+ T cells                        | SD after 8 w, PR after 16 w                    |
| Schuurhuis et al, 2009 [46]<br>(see Aarntzen et al, 2012 [8])<br>Phase I 1-arm<br>Tyr and gp100-expressing<br>stage III melanoma | 11 | mDC + EP<br>IVT mRNA<br>TAA (tyr or<br>gp100)                                                       | Unspecified<br>number of DC +<br>KLH IN, LN<br>dissection                                                  | 7/11 TAA-specific DTH-infiltrating CD8+ T<br>cells                                           | Not evaluated                                  |



|                                                                                                                             |    |                                                                                     |                                                                                        |                                                                                                                                          |                                                                                                                                          |
|-----------------------------------------------------------------------------------------------------------------------------|----|-------------------------------------------------------------------------------------|----------------------------------------------------------------------------------------|------------------------------------------------------------------------------------------------------------------------------------------|------------------------------------------------------------------------------------------------------------------------------------------|
| Kyte et al, 2006 [47]<br>(see Kyte et al, 2016 [1])<br>Phase I/II 2-arm<br>Metastatic melanoma, 1<br>stage III              | 24 | mDC + EP<br>Tumor RNA<br>(autologous)                                               | $2 \times 10^7$ DC IN or<br>ID                                                         | 10/19 $\uparrow$ tumor-specific PBMC proliferation<br>(fresh or after in vitro restimulation) and/or<br>DTH reaction                     | 2/20 SD, 18/20 PD<br>Mean OS 12.3 m ( $n = 22$ )<br>1/22 vitiligo grade 1<br>2/24 rapid PD                                               |
| Van Tendeloo et al, 2010 [48]<br>(see Anguille et al, 2017 [21])<br>Phase I/II 1-arm<br>AML MRD                             | 10 | mDC + EP<br>IVT mRNA<br>TAA (WT1)                                                   | $5 \times 10^6$ , $10^7$ or $2 \times 10^7$ DC + KLH ID                                | 2/5 WT1 epitope-specific CD8+ T cells<br>$\uparrow$ WT1-specific IFN- $\gamma$ -secreting CD8+ T cells<br>(after in vitro restimulation) | 2/2 conversion of PR to CR<br>4/7 $\downarrow$ blood WT1 mRNA levels<br>6/9 relapsed, 3/10 sustained CR<br>1/10 thrombocytopenia grade 3 |
| Van Driessche et al, 2009<br>[49]<br>(see Anguille et al, 2017 [21])<br>Phase I 1-arm dose-<br>escalation<br>AML MRD, 1 MDS | 10 | mDC + EP<br>IVT mRNA<br>TAA (WT1)                                                   | $5 \times 10^6$ , $10^7$ or $2 \times 10^7$ DC + KLH ID                                | Not evaluated                                                                                                                            | Not evaluated<br>7/10 4 vaccines at desired dose feasible                                                                                |
| Mitchell et al, 2015 [50]<br>(see Batich et al, 2017 [30])<br>Case<br>Glioblastoma                                          | 1  | mat [iDC + PP]<br>IVT mRNA<br>CMV<br>pp65/LAMP<br>iDC + PP                          | Resection, CRT,<br>CT + $2 \times 10^7$ DC<br>ID + 800 U GM-<br>CSF                    | Anti-GM-CSF IgE, IgM, IgG                                                                                                                | Grade 3 allergic reaction (hives, rash,<br>headache, confusion, flushes, conjunctivitis)<br>to GM-CSF                                    |
| Nair et al, 2002 [51]<br>(see Morse et al, 2003 [33])<br>Case<br>CEA+ metastatic ACUP                                       | 1  | Tumor RNA<br>(autologous)<br>IVT mRNA<br>TAA (CEA; 6 m<br>before in other<br>trial) | $3 \times 10^7$ DC IV +<br>$10^6$ DC ID                                                | $\uparrow$ specific tumor RNA-loaded DC target lysis<br>by PBMC                                                                          | No clinical response (continued PD)                                                                                                      |
| Coosemans et al, 2010 [52]<br>(see Coosemans et al, 2013<br>[44])<br>Case<br>Stage IV uterine cancer                        | 1  | mDC + EP<br>IVT mRNA<br>TAA (WT1)                                                   | CT, debulking,<br>multiple CT, 6-<br>$8.8 \times 10^6$ DC ID +<br>topical<br>imiquimod | 1/1 $\uparrow$ WT1 epitope-specific CD8+ T cells                                                                                         | 1/1 PD                                                                                                                                   |

<sup>a</sup> All immature (iDC), mature (mDC) and matured immature (mat [iDC + x]) dendritic cells were monocyte-derived. <sup>b</sup> TriMix mRNA is a mixture of CD40L, CD70 and constitutively-active Toll-like receptor-4 mRNA. <sup>c</sup> Conjugate of diphtheria toxin to recombinant IL-2.

**Abbreviations:** †: increased; ‡, decreased; AC, adenocarcinoma; ACUP, adenocarcinoma of unknown primary; AE, adverse event; AML, acute myeloid leukemia; ART, antiretroviral therapy; ATI, analytical treatment interruption; avg, average; BCMA, B-cell maturation antigen; CEA, carcinoembryonic antigen; CMV, cytomegalovirus; CNS, central nervous system; CR, complete response/remission; CRC, colorectal cancer; CRT, chemoradiotherapy; CT, chemotherapy; CTL, cytotoxic T lymphocyte; DC, dendritic cell; DFS, disease-free survival; DSS, disease-specific survival; DTH, delayed-type hypersensitivity skin test; ELISpot, enzyme-linked immunospot; EM, effector/memory; EP, electroporation; FIGO, International Federation of Gynecology and Obstetrics (Fédération Internationale de Gynécologie et d'Obstétrique); FR- $\alpha$ , folate receptor- $\alpha$ ; FU, follow up; GI, gastrointestinal; GVHD, graft-versus-host disease; gp100, glycoprotein 100; HCC, hepatocellular carcinoma; HCV, hepatitis C virus; HIV, human immunodeficiency virus; HSCT, hematopoietic stem-cell transplantation; Hsp70, 70 kilodalton heat shock protein; hTERT, human telomerase reverse transcriptase; ID, intradermal; IDO, indoleamine 2–3-deoxygenase; IFN, interferon; IL, interleukin; IN, intranodal; iP, inducible immunoproteasome; IT, immunotherapy; ITP, idiopathic thrombocytopenic purpura; IV, intravenous; IVT, in vitro transcribed; KLH, keyhole limpet hemocyanin; LAMP, lysosome-associated membrane protein; LE, life expectancy; LF, lipofection; LN, lymph node; M+, metastasis; Mage, melanoma-associated antigen; mCRPC, metastatic castration-resistant prostate cancer; MelanA, melanoma antigen; mPC, metastatic prostate cancer; MR, mixed response; MRD, minimal residual disease; Muc1, Mucin 1, cell surface associated; ns, not significant according to predefined statistics; OS, overall survival; PAP, prostate acid phosphatase; PB, peripheral blood; PBMC, peripheral blood mononuclear cells; PD, progressive disease; PFS, progression-free survival; PP, passive pulsing; PR, partial response/remission; PSA, prostate-specific antigen; RCT, randomized controlled trial; rdm, randomized; RT, radiotherapy; SC, subcutaneous; SD, stable disease; TAA, tumor-associated antigen; Td, tetanus/diphtheria toxoid; tyr, tyrosinase; WT1, Wilms' tumor 1.

## Reference

1. Kyte, J.A.; Aamdal, S.; Dueland, S.; Sæbøe-Larsen, S.; Inderberg, E.M.; Madsbu, U.E.; Skovlund, E.; Gaudernack, G.; Kvalheim, G. Immune response and long-term clinical outcome in advanced melanoma patients vaccinated with tumor-mRNA-transfected dendritic cells. *Oncoimmunology* **2016**, *5*, e1232237.
2. Sioud, M.; Nyakas, M.; Sæbøe-Larssen, S.; Mobergslie, A.; Aamdal, S.; Kvalheim, G. Diversification of Antitumour Immunity in a Patient with Metastatic Melanoma Treated with Ipilimumab and an IDO-Silenced Dendritic Cell Vaccine. *Case Rep. Med.* **2016**. doi: 10.1155/2016/9639585.
3. Borch, T.H.; Engell-Noerregaard, L.; Zeeberg Iversen, T.; Ellebaek, E.; Met, Ö.; Hansen, M.; Andersen, M.H.; Thor Straten, P.; Svane, I.M. mRNA-transfected dendritic cell vaccine in combination with metronomic cyclophosphamide as treatment for patients with advanced malignant melanoma. *Oncoimmunology* **2016**, *5*, e1207842.
4. Wilgenhof, S.; Corthals, J.; Heirman, C.; van Baren, N.; Lucas, S.; Kvistborg, P.; Thielemans, K.; Neyns, B. Phase II Study of Autologous Monocyte-Derived mRNA Electroporated Dendritic Cells (TriMixDC-MEL) Plus Ipilimumab in Patients With Pretreated Advanced Melanoma. *J. Clin. Oncol.* **2016**, *34*, 1330–1338.
5. Wilgenhof, S.; Corthals, J.; Van Nuffel, A.M.; Benteyn, D.; Heirman, C.; Bonehill, A.; Thielemans, K.; Neyns, B. Long-term clinical outcome of melanoma patients treated with messenger RNA-electroporated dendritic cell therapy following complete resection of metastases. *Cancer Immunol. Immunother.* **2015**, *64*, 381–388.
6. Dannull, J.; Haley, N.R.; Archer, G.; Nair, S.; Boczkowski, D.; Harper, M.; De Rosa, N.; Pickett, N.; Mosca, P.J.; Burchette, J.; et al. Melanoma immunotherapy using mature DCs expressing the constitutive proteasome. *J. Clin. Invest.* **2013**, *123*, 3135–3145.
7. Wilgenhof, S.; Van Nuffel, A.M.; Benteyn, D.; Corthals, J.; Aerts, C.; Heirman, C.; Van Riet, I.; Bonehill, A.; Thielemans, K.; Neyns, B.; et al. A phase IB study on intravenous synthetic mRNA electroporated dendritic cell immunotherapy in pretreated advanced melanoma patients. *Ann. Oncol.* **2013**, *24*, 2686–2693.
8. Aarntzen, E.H.; Schreiber, G.; Bol, K.; Lesterhuis, W.J.; Croockewit, A.J.; de Wilt, J.H.; van Rossum, M.M.; Blokx, W.A.; Jacobs, J.F.; Duiveman-de Boer, T.; et al. Vaccination with mRNA-electroporated dendritic cells induces robust tumor antigen-specific CD4+ and CD8+ T cells responses in stage III and IV melanoma patients. *Clin. Cancer Res.* **2012**, *18*, 5460–5470.
9. Wilgenhof, S.; Van Nuffel, A.M.; Corthals, J.; Heirman, C.; Tuyaerts, S.; Benteyn, D.; De Coninck, A.; Van Riet, I.; Verfaillie, G.; Vandelo, J.; et al. Therapeutic vaccination with an autologous mRNA electroporated dendritic cell vaccine in patients with advanced melanoma. *J. Immunother.* **2011**, *34*, 448–456.

10. Markovic, S.N.; Dietz, A.B.; Greiner, C.W.; Maas, M.L.; Butler, G.W.; Padley, D.J.; Bulur, P.A.; Allred, J.B.; Creagan, E.T.; Ingle, J.N.; et al. Preparing clinical-grade myeloid dendritic cells by electroporation-mediated transfection of in vitro amplified tumor-derived mRNA and safety testing in stage IV malignant melanoma. *J. Transl. Med.* **2006**, *4*, 35.
11. Gay, C.L.; DeBenedette, M.A.; Tcherepanova, I.Y.; Gamble, A.; Lewis, W.E.; Cope, A.B.; Kuruc, J.D.; McGee, K.S.; Kearney, M.F.; Coffin, J.M.; et al. Immunogenicity of AGS-004 Dendritic Cell Therapy in Patients Treated During Acute HIV Infection. *AIDS Res. Hum. Retroviruses* **2018**, *34*, 111–122.
12. Jacobson, J.M.; Routy, J.P.; Welles, S.; DeBenedette, M.; Tcherepanova, I.; Angel, J.B.; Asmuth, D.M.; Stein, D.K.; Baril, J.G.; McKellar, M.; et al. Dendritic Cell Immunotherapy for HIV-1 Infection Using Autologous HIV-1 RNA: A Randomized, Double-Blind, Placebo-Controlled Clinical Trial. *J. Acquir. Immune Defic. Syndr.* **2016**, *72*, 31–38.
13. Gandhi, R.T.; Kwon, D.S.; Macklin, E.A.; Shopis, J.R.; McLean, A.P.; McBrine, N.; Flynn, T.; Peter, L.; Sbrolla, A.; Kaufmann, D.E.; et al. Immunization of HIV-1-Infected Persons With Autologous Dendritic Cells Transfected With mRNA Encoding HIV-1 Gag and Nef: Results of a Randomized, Placebo-Controlled Clinical Trial. *J. Acquir. Immune Defic. Syndr.* **2016**, *71*, 246–253.
14. Van Gulck, E.; Vlieghe, E.; Vekemans, M.; Van Tendeloo, V.F.; Van De Velde, A.; Smits, E.; Anguille, S.; Cools, N.; Goossens, H.; Mertens, L.; et al. mRNA-based dendritic cell vaccination induces potent antiviral T-cell responses in HIV-1-infected patients. *AIDS* **2012**, *26*, F1–F12.
15. Allard, S.D.; De Keersmaecker, B.; de Goede, A.L.; Verschuren, E.J.; Koetsveld, J.; Reedijk, M.L.; Wylock, C.; De Bel, A.V.; Vandelloo, J.; Pistor, F.; et al. A phase I/IIa immunotherapy trial of HIV-1-infected patients with Tat, Rev and Nef expressing dendritic cells followed by treatment interruption. *Clin. Immunol.* **2012**, *142*, 252–268.
16. Routy, J.P.; Boulassel, M.R.; Yassine-Diab, B.; Nicolette, C.; Healey, D.; Jain, R.; Landry, C.; Yegorov, O.; Tcherepanova, I.; Monesmith, T.; et al. Immunologic activity and safety of autologous HIV RNA-electroporated dendritic cells in HIV-1 infected patients receiving antiretroviral therapy. *Clin. Immunol.* **2010**, *134*, 140–147.
17. Kongsted, P.; Borch, T.H.; Ellebaek, E.; versen, T.Z.; Andersen, R.; Met, Ö.; Hansen, M.; Lindberg, H.; Sengeløv, L.; Svane, I.M.; et al. Dendritic cell vaccination in combination with docetaxel for patients with metastatic castration-resistant prostate cancer: A randomized phase II study. *Cytotherapy* **2017**, *19*, 500–513.
18. Mu, L.J.; Kyte, J.A.; Kvalheim, G.; Aamdal, S.; Dueland, S.; Hauser, M.; Hammerstad, H.; Waehre, H.; Raabe, N.; Gaudernack, G.; et al. Immunotherapy with allotumour mRNA-transfected dendritic cells in androgen-resistant prostate cancer patients. *Br. J. Cancer* **2005**, *93*, 749–756.
19. Su, Z.; Dannull, J.; Yang, B.K.; Dahm, P.; Coleman, D.; Yancey, D.; Sichi, S.; Niedzwiecki, D.; Boczkowski, D.; Gilboa, E.; et al. Telomerase mRNA-transfected dendritic cells stimulate antigen-specific CD8+ and CD4+ T cell responses in patients with metastatic prostate cancer. *J. Immunol.* **2005**, *174*, 3798–3807.
20. Heiser, A.; Coleman, D.; Dannull, J.; Yancey, D.; Maurice, M.A.; Lallas, C.D.; Dahm, P.; Niedzwiecki, D.; Gilboa, E.; Vieweg, J.; et al. Autologous dendritic cells transfected with prostate-specific antigen RNA stimulate CTL responses against metastatic prostate tumors. *J. Clin. Invest.* **2002**, *109*, 409–417.
21. Anguille, S.; Van de Velde, A.L.; Smits, E.L.; Van Tendeloo, V.F.; Juliusson, G.; Cools, N.; Nijs, G.; Stein, B.; Lion, E.; Van Driessche, A.; et al. Dendritic cell vaccination as postremission treatment to prevent or delay relapse in acute myeloid leukemia. *Blood* **2017**, *130*, 1713–1721.
22. Khoury, H.J.; Collins, R.H.Jr.; Blum, W.; Stiff, P.S.; Elias, L.; Lebkowski, J.S.; Reddy, A.; Nishimoto, K.P.; Sen, D.; Wirth, E.D. 3<sup>rd</sup>; et al. Immune responses and long-term disease recurrence status after telomerase-based dendritic cell immunotherapy in patients with acute myeloid leukemia. *Cancer* **2017**, *123*, 3061–3072.
23. Amin, A.; Dudek, A.Z.; Logan, T.F.; Lance, R.S.; Holzbeierlein, J.M.; Knox, J.J.; Master, V.A.; Pal, S.K.; Miller, W.H.Jr.; Karsh, L.I.; et al. Survival with AGS-003, an autologous dendritic cell-based immunotherapy, in combination with sunitinib in unfavorable risk patients with advanced renal cell carcinoma (RCC): Phase 2 study results. *J. Immunother. Cancer* **2015**, *3*, 14.
24. Dannull, J.; Su, Z.; Rizzieri, D.; Yang, B.K.; Coleman, D.; Yancey, D.; Zhang, A.; Dahm, P.; Chao, N.; Gilboa, E.; et al. Enhancement of vaccine-mediated antitumor immunity in cancer patients after depletion of regulatory T cells. *J. Clin. Invest.* **2005**, *115*, 3623–3633.
25. Su, Z.; Dannull, J.; Heiser, A.; Yancey, D.; Pruitt, S.; Madden, J.; Coleman, D.; Niedzwiecki, D.; Gilboa, E.; Vieweg, J.; et al. Immunological and clinical responses in metastatic renal cancer patients vaccinated with tumor RNA-transfected dendritic cells. *Cancer Res.* **2003**, *63*, 2127–33.

26. Shindo, Y.; Hazama, S.; Maeda, Y.; Matsui, H.; Iida, M.; Suzuki, N.; Yoshimura, K.; Ueno, T.; Yoshino, S.; Sakai, K.; et al. Adoptive immunotherapy with MUC1-mRNA transfected dendritic cells and cytotoxic lymphocytes plus gemcitabine for unresectable pancreatic cancer. *J. Transl. Med.* **2014**, *12*, 175.
27. Suso, E.M.; Dueland, S.; Rasmussen, A.M.; Vethrus, T.; Aamdal, S.; Kvalheim, G.; Gaudernack, G. hTERT mRNA dendritic cell vaccination: complete response in a pancreatic cancer patient associated with response against several hTERT epitopes. *Cancer Immunol. Immunother.* **2011**, *60*, 809–818.
28. Morse, M.A.; Nair, S.K.; Boczkowski, D.; Tyler, D.; Hurwitz, H.I.; Proia, A.; Clay, T.M.; Schlom, J.; Gilboa, E.; Lyerly, H.K. The feasibility and safety of immunotherapy with dendritic cells loaded with CEA mRNA following neoadjuvant chemoradiotherapy and resection of pancreatic cancer. *Int. J. Gastrointest. Cancer* **2002**, *32*, 1–6.
29. Reap, E.A.; Suryadevara, C.M.; Batich, K.A.; Sanchez-Perez, L.; Archer, G.E.; Schmittling, R.J.; Norberg, P.K.; Herndon, J.E.2<sup>nd</sup>; Healy, P.; Congdon, K.L.; et al. Dendritic Cells Enhance Polyfunctionality of Adoptively Transferred T Cells That Target Cytomegalovirus in Glioblastoma. *Cancer Res.* **2018**, *78*, 256–264.
30. Batich, K.A.; Reap, E.A.; Archer, G.E.; Sanchez-Perez, L.; Nair, S.K.; Schmittling, R.J.; Norberg, P.; Xie, W.; Herndon II, J.E.; et al. Long-term Survival in Glioblastoma with Cytomegalovirus pp65-Targeted Vaccination. *Clin. Cancer Res.* **2017**, *23*, 1898–1909.
31. Mitchell, D.A.; Batich, K.A.; Gunn, M.D.; Huang, M.N.; Sanchez-Perez, L.; Nair, S.K.; Congdon, K.L.; Reap, E.A.; Archer, G.E.; Desjardins, A.; et al. Tetanus toxoid and CCL3 improve dendritic cell vaccines in mice and glioblastoma patients. *Nature* **2015**, *519*, 366–369.
32. Vik-Mo, E.O.; Nyakas, M.; Mikkelsen, B.V.; Moe, M.C.; Due-Tønnesen, P.; Suso, E.M.; Sæbøe-Larssen, S.; Sandberg, C.; Brinchmann, J.E.; Helseth, E.; et al. Therapeutic vaccination against autologous cancer stem cells with mRNA-transfected dendritic cells in patients with glioblastoma. *Cancer Immunol. Immunother.* **2013**, *62*, 1499–1509.
33. Morse, M.A.; Nair, S.K.; Mosca, P.J.; Hobeika, A.C.; Clay, T.M.; Deng, Y.; Boczkowski, D.; Proia, A.; Neidzwiecki, D.; Clavien, P.A.; et al. Immunotherapy with autologous, human dendritic cells transfected with carcinoembryonic antigen mRNA. *Cancer Invest.* **2003**, *21*, 341–349.
34. Lesterhuis, W.J.; De Vries, I.J.; Schreiber, G.; Schuurhuis, D.H.; Aarntzen, E.H.; De Boer, A.; Scharenborg, N.M.; Van De Rakt, M.; Hesselink, E.J.; Figdor, C.G.; et al. Immunogenicity of dendritic cells pulsed with CEA peptide or transfected with CEA mRNA for vaccination of colorectal cancer patients. *Anticancer Res.* **2010**, *30*, 5091–5097.
35. Rains, N.; Cannan, R.J.; Chen, W.; Stubbs, R.S.; et al. Development of a dendritic cell (DC)-based vaccine for patients with advanced colorectal cancer. *Hepatogastroenterology* **2001**, *48*, 347–351.
36. Hobo, W.; Strobbe, L.; Maas, F.; Fredrix, H.; Greupink-Draaisma, A.; Esendam, B.; de Witte, T.; Preijers, F.; Levens, H.; van Rees, B.; et al. Immunogenicity of dendritic cells pulsed with MAGE3, Survivin and B-cell maturation antigen mRNA for vaccination of multiple myeloma patients. *Cancer Immunol. Immunother.* **2013**, *62*, 1381–1392.
37. Maeda, Y.; Yoshimura, K.; Matsui, H.; Shindo, Y.; Tamesa, T.; Tokumitsu, Y.; Hashimoto, N.; Tokuhisa, Y.; Sakamoto, K.; Sakai, K.; et al. Dendritic cells transfected with heat-shock protein 70 messenger RNA for patients with hepatitis C virus-related hepatocellular carcinoma: a phase 1 dose escalation clinical trial. *Cancer Immunol. Immunother.* **2015**, *64*, 1047–1056.
38. Caruso, D.A.; Orme, L.M.; Amor, G.M.; Neale, A.M.; Radcliff, F.J.; Downie, P.; Tang, M.L.; Ashley, D.M. Results of a Phase I study utilizing monocyte-derived dendritic cells pulsed with tumor RNA in children with Stage 4 neuroblastoma. *Cancer* **2005**, *103*, 1280–1291.
39. Caruso, D.A.; Orme, L.M.; Neale, A.M.; Radcliff, F.J.; Amor, G.M.; Maixner, W.; Downie, P.; Hassall, T.E.; Tang, M.L.; Ashley, D.M. Results of a phase 1 study utilizing monocyte-derived dendritic cells pulsed with tumor RNA in children and young adults with brain cancer. *Neuro. Oncol.* **2004**, *6*, 236–246.
40. Van Craenenbroeck, A.H.; Smits, E.L.; Anguille, S.; Van de Velde, A.; Stein, B.; Braeckman, T.; Van Camp, K.; Nijs, G.; Ieven, M.; Goossens, H.; et al. Induction of cytomegalovirus-specific T cell responses in healthy volunteers and allogeneic stem cell recipients using vaccination with messenger RNA-transfected dendritic cells. *Transplantation* **2015**, *99*, 120–127.
41. Coosemans, A.; Vanderstraeten, A.; Tuybaerts, S.; Verschuere, T.; Moerman, P.; Berneman, Z.; Vergote, I.; Amant, F.; Van Gool, S.W.; et al. Immunological response after WT1 mRNA-loaded dendritic cell immunotherapy in ovarian carcinoma and carcinosarcoma. *Anticancer Res.* **2013**, *33*, 3855–3859.

42. Sioud, M.; Saeboe-Larssen, S.; Hetland, T.E.; Kaern, J.; Mobergslie, A.; Kvalheim, G. Silencing of indoleamine 2,3-dioxygenase enhances dendritic cell immunogenicity and antitumour immunity in cancer patients. *Int. J. Oncol.* **2013**, *43*, 280–288.
43. Hernando, J.J.; Park, T.W.; Fischer, H.P.; Zivanovic, O.; Braun, M.; Pölcher, M.; Grün, U.; Leutner, C.; Pöttsch, B.; Kuhn, W. Vaccination with dendritic cells transfected with mRNA-encoded folate-receptor- $\alpha$  for relapsed metastatic ovarian cancer. *Lancet. Oncol.* **2007**, *8*, 451–454.
44. Coosemans, A.; Vanderstraeten, A.; Tuyaeerts, S.; Verschuere, T.; Moerman, P.; Berneman, Z.N.; Vergote, I.; Amant, F.; VAN Gool, S.W. Wilms' Tumor Gene 1 (WT1)-loaded dendritic cell immunotherapy in patients with uterine tumors: a phase I/II clinical trial. *Anticancer Res.* **2013**, *33*, 5495–5500.
45. Van Nuffel, A.M.; Benteyn, D.; Wilgenhof, S.; Corthals, J.; Heirman, C.; Neyns, B.; Thielemans, K.; Bonehill, A. Intravenous and intradermal TriMix-dendritic cell therapy results in a broad T-cell response and durable tumor response in a chemorefractory stage IV-M1c melanoma patient. *Cancer Immunol. Immunother.* **2012**, *61*, 1033–1043.
46. Schuurhuis, D.H.; Verdijk, P.; Schreiber, G.; Aarntzen, E.H.; Scharenborg, N.; de Boer, A.; van de Rakt, M.W.; Kerkhoff, M.; Gerritsen, M.J.; Eijckeler, F.; et al. In situ expression of tumor antigens by messenger RNA-electroporated dendritic cells in lymph nodes of melanoma patients. *Cancer Res.* **2009**, *69*, 2927–2934.
47. Kyte, J.A.; Mu, L.; Aamdal, S.; Kvalheim, G.; Dueland, S.; Hauser, M.; Gullestad, H.P.; Ryder, T.; Lislrud, K.; Hammerstad, H.; et al. Phase I/II trial of melanoma therapy with dendritic cells transfected with autologous tumor-mRNA. *Cancer Gene Ther.* **2006**, *13*, 905–918.
48. Van Tendeloo, V.F.; Van de Velde, A.; Van Driessche, A.; Cools, N.; Anguille, S.; Ladell, K.; Gostick, E.; Vermeulen, K.; Pieters, K.; Nijs, G.; et al. Induction of complete and molecular remissions in acute myeloid leukemia by Wilms' tumor 1 antigen-targeted dendritic cell vaccination. *Proc. Natl. Acad. Sci. USA* **2010**, *107*, 13824–13829.
49. Van Driessche, A.; Van de Velde, A.L.; Nijs, G.; Braeckman, T.; Stein, B.; De Vries, J.M.; Berneman, Z.N.; Van Tendeloo, V.F. Clinical-grade manufacturing of autologous mature mRNA-electroporated dendritic cells and safety testing in acute myeloid leukemia patients in a phase I dose-escalation clinical trial. *Cytotherapy* **2009**, *11*, 653–668.
50. Mitchell, D.A.; Sayour, E.J.; Reap, E.; Schmittling, R.; DeLeon, G.; Norberg, P.; Desjardins, A.; Friedman, A.H.; Friedman, H.S.; Archer, G.; et al. Severe adverse immunologic reaction in a patient with glioblastoma receiving autologous dendritic cell vaccines combined with GM-CSF and dose-intensified temozolomide. *Cancer Immunol. Res.* **2015**, *3*, 320–325.
51. Nair, S.K.; Morse, M.; Boczkowski, D.; Cumming, R.I.; Vasovic, L.; Gilboa, E.; Lyerly, H.K. Induction of tumor-specific cytotoxic T lymphocytes in cancer patients by autologous tumor RNA-transfected dendritic cells. *Ann. Surg.* **2002**, *235*, 540–549.
52. Coosemans, A.; Wolf, M.; Berneman, Z.N.; Van Tendeloo, V.; Vergote, I.; Amant, F.; Van Gool, S.W. Immunological response after therapeutic vaccination with WT1 mRNA-loaded dendritic cells in end-stage endometrial carcinoma. *Anticancer Res.* **2010**, *30*, 3709–3714.

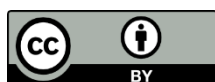

Supplement: cancers-12-00299-s001.pdf [file cancers-12-00299-s001.pdf]
